# Supplementary material
Source: publisher figshare collection journal article supplement (https://karger.figshare.com/articles/dataset/_/24551092)
Supplement: Supplementary file 1 [file 1]

S2- Newcastle Ottawa Scale for observational studies

| **First author, year** | **Selection (up to 4 points)** | **Comparability (up to 2 points)** | **Outcome/Exposure (up to 3 points)** | **NOS total (up to 9 points)** |
| --- | --- | --- | --- | --- |
| Pham T.T. et al., 2017 | **4** | **2** | **3** | **9** |
| Corona Pérez-Cardona P.S. et al, 2012 | **4** | **2** | **3** | **9** |

**Table S2.** Risk of bias of non-interventional studies by means of Newcastle-Ottawa Scale (NOS).
